# Supplementary material for: Potential role of iron in repair of inflammatory demyelinating lesions
Source: JCI journal article supplement (doi:10.1172/jci126809), 2019-09-08
Supplement: sd1 [file 1]

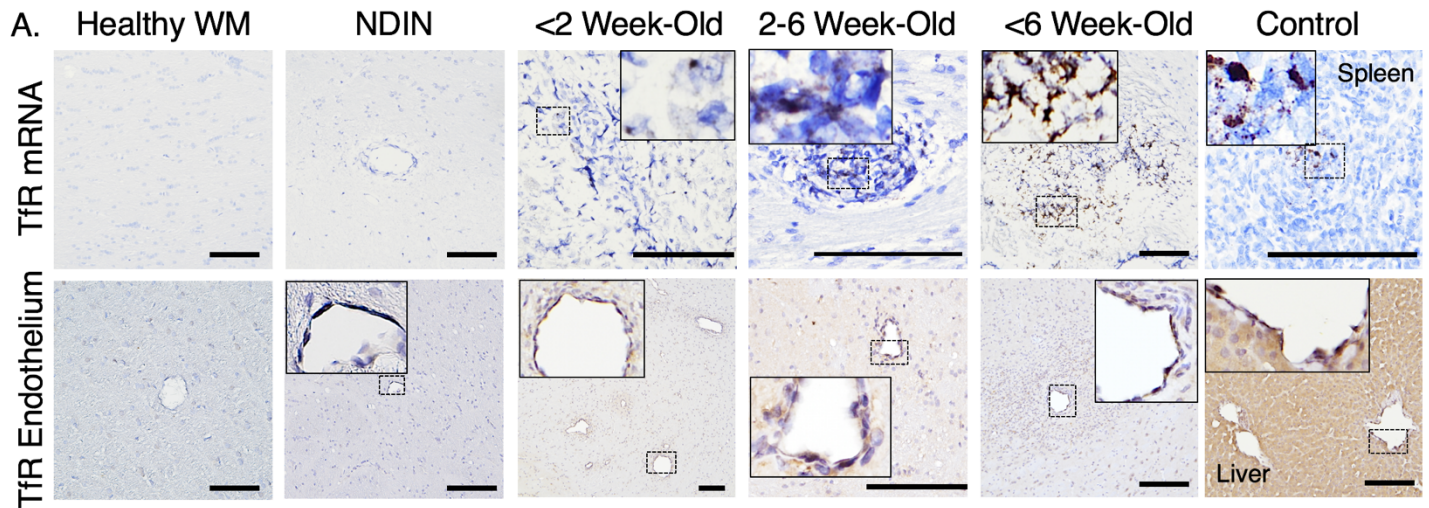

**B.** TfR in Marmoset EAE Lesion Endothelium

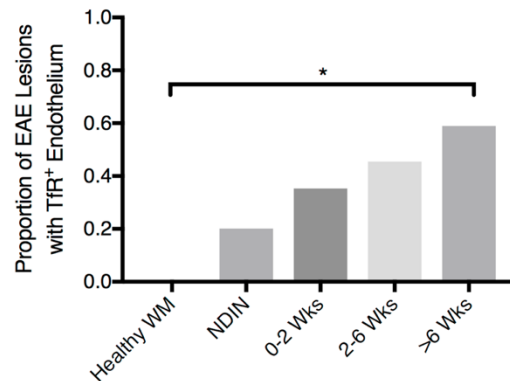

**Supplementary Figure 1. Endothelial cells express transferrin receptor in marmoset EAE lesions.** (A) Transferrin receptor (TfR) mRNA is detected in <2-week-old, 2–6-week-old, and >6-week-old lesions, but not in healthy white matter or non-demyelinated inflammatory nodules (NDIN). TfR is detected in the endothelium of all EAE lesions. (B) Quantification of the prevalence of EAE lesions with increased TfR expression in the endothelium shows that TfR increases as lesions age and is highest in >6-week-old, demyelinated lesions. Positive controls = marmoset spleen and liver. Scale bar = 100 $\mu$ m. Counterstain = hematoxylin. Lesions selected from marmosets #1, 4, 6, 8, 9, 10, and 11. \* $p < 0.05$  (Dunn's multiple comparisons test).

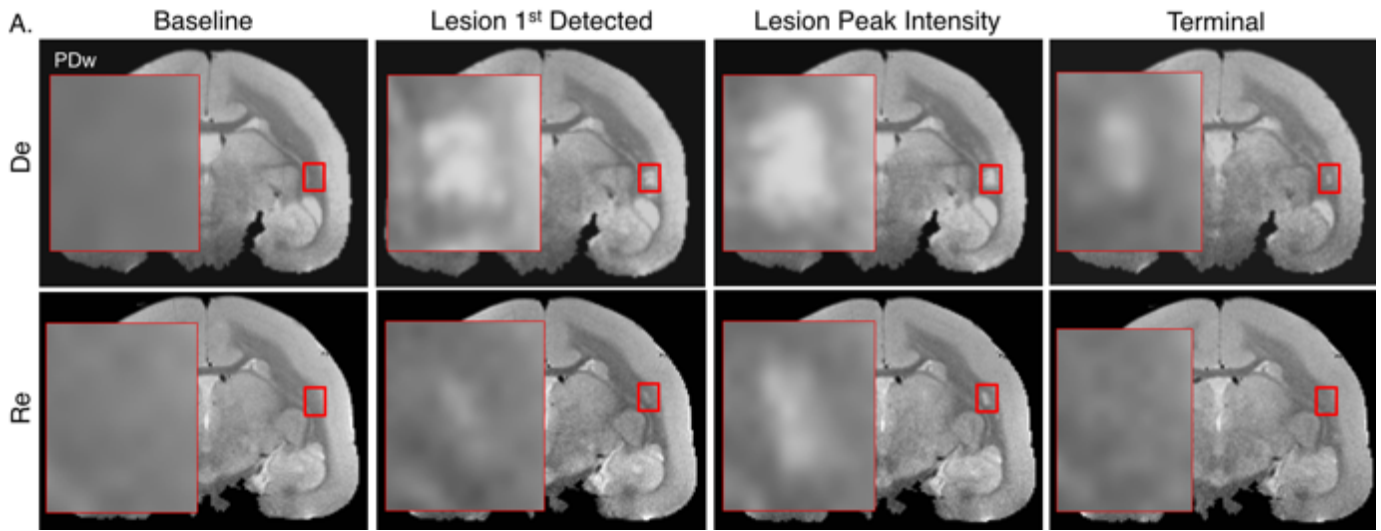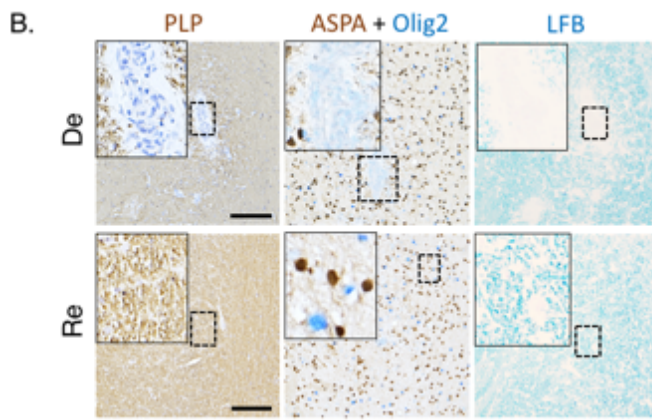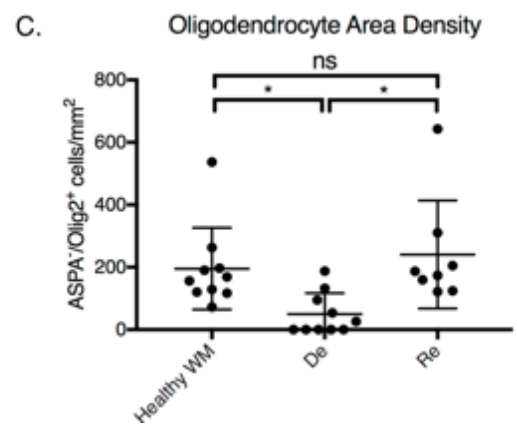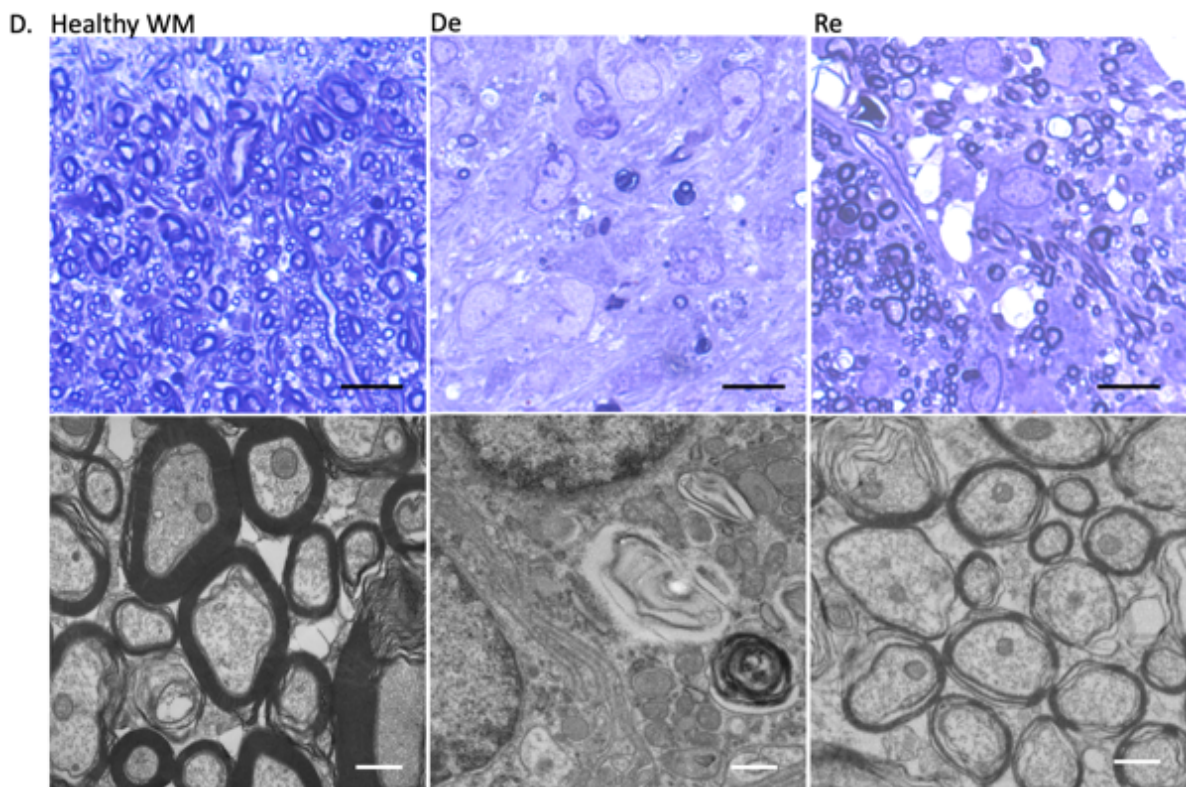

**Supplementary Figure 2. Marmoset EAE lesion repair is detectable by serial in vivo MRI and histopathology, confirmed by transmission electron microscopy.** (A) Serial in vivo proton density-weighted (PDw) MRI, in combination with histopathology, was used to identify both demyelinated (De) and remyelinated (Re) EAE lesions, in which the latter demonstrated hyperintense signal that returned to isointensity by the terminal time point. (B) Immunohistochemical staining for representative demyelinated (De) and remyelinated (Re) chronic (>6-week-old) EAE lesions, identical to the lesions shown in panel A, shows that remyelinated lesions have abundant myelin (PLP and especially LFB) and oligodendrocyte-lineage cells (ASPA + Olig2) in the lesion area, whereas demyelinated lesions do not. (C) Quantification of ASPA<sup>-</sup>/Olig2<sup>+</sup> oligodendrocyte-lineage cells in demyelinated vs. remyelinated lesions shows that remyelinated lesions have significantly more oligodendrocytes, indistinguishable from the level in healthy white matter. (D) Transmission electron microscopy (TEM) image of control white matter, demyelinated lesion, and remyelinated lesion. Top panel shows toluidine blue staining, and the bottom row demonstrates EM images. Compared to the control panel, the putative demyelinated lesion has minimal myelin sheaths, whereas the putative remyelinated lesion has apparently thin myelin, as expected for remyelination. Black scale bars = 10µm; white scale bars = 500nm. \*p < 0.05 (ANOVA). Scale bar = 100µm. Counterstain = hematoxylin for PLP. Lesions selected from marmosets #1, 2, 5, and 10.

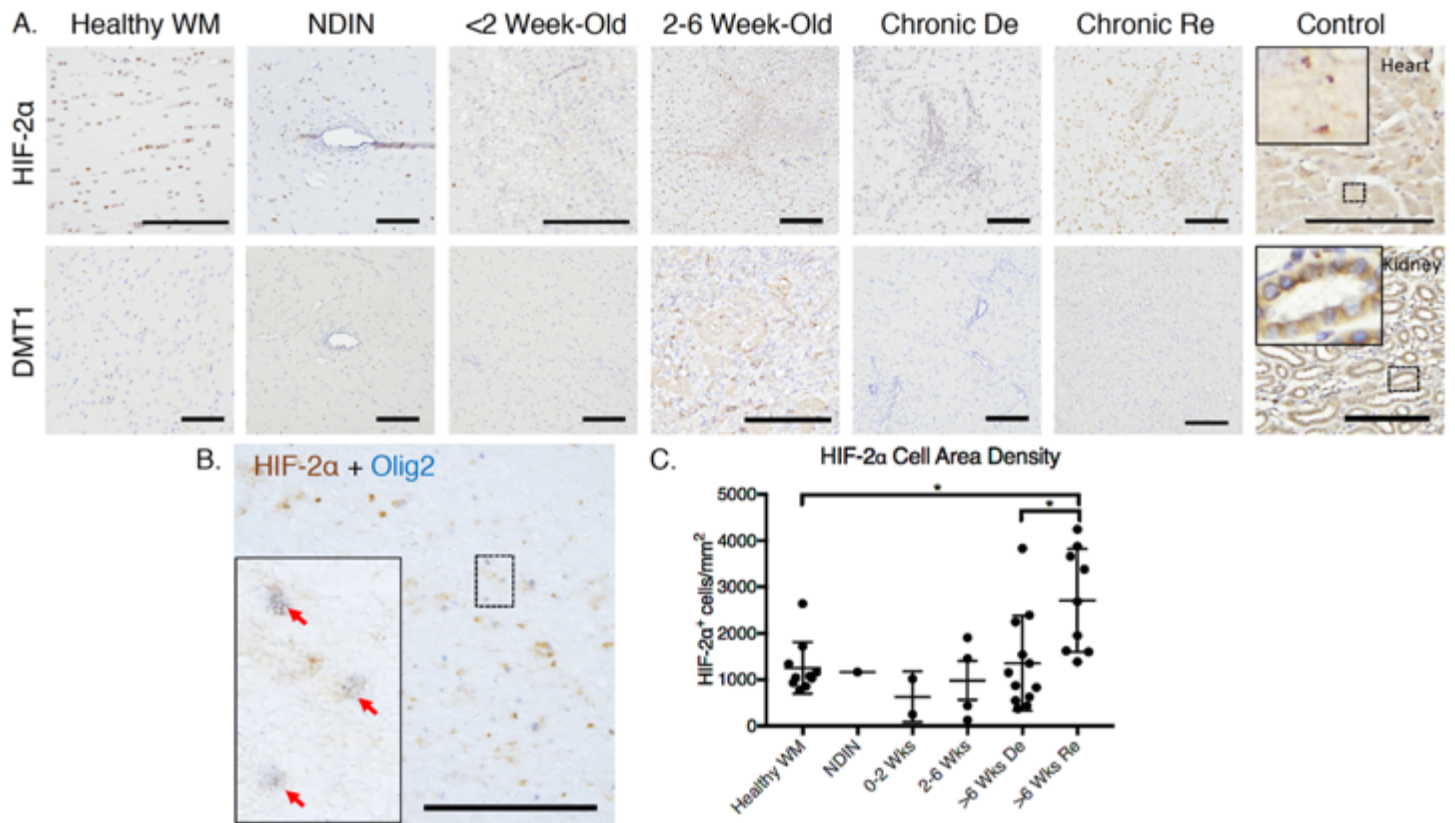

**Supplementary Figure 3. Spatiotemporal dynamics of HIF-2 $\alpha$  levels in marmoset EAE lesions does not correlate with that of DMT1.** (A) HIF-2 $\alpha$  is found in healthy white matter and at all stages of EAE lesion development, but not in clear correlation with DMT1 levels. (B) HIF-2 $\alpha$  is present in Olig2<sup>+</sup> oligodendrocyte-lineage cells (red arrows). (C) Graphical representation of the prevalence of HIF-2 $\alpha$ <sup>+</sup> cells in marmoset EAE lesions, showing increased levels in remyelinated lesions. Positive control = marmoset heart for HIF-2 $\alpha$ ; DMT1 is reproduced from Figure 2. Scale bar = 100 $\mu$ m. Counterstain = hematoxylin for (A). \* $p < 0.05$  (one-way ANOVA). Lesions selected from marmosets #1, 3, 6, 7, 9, and 10.

|              | Sex | Age at Baseline | Experimental Duration (months) | Additional Inoculation | Lesion Location                                          |
|--------------|-----|-----------------|--------------------------------|------------------------|----------------------------------------------------------|
| Marmoset #1  | M   | 5.5             | 14                             | N/A                    | Frontal, temporal, and occipital lobe                    |
| Marmoset #2  | M   | 5.5             | 14                             | N/A                    | Temporal lobe                                            |
| Marmoset #3  | F   | 3               | 3.5                            | N/A                    | Temporal and occipital lobes                             |
| Marmoset #4  | F   | 3               | 4                              | N/A                    | Internal capsule; frontal, temporal, and occipital lobes |
| Marmoset #5  | M   | 2.5             | 13                             | N/A                    | Temporal and occipital lobes                             |
| Marmoset #6  | M   | 2.5             | 9.5                            | N/A                    | Optic nerve, parietal and occipital lobes                |
| Marmoset #7  | F   | 2.5             | 1                              | HHV6B                  | Frontal lobe                                             |
| Marmoset #8  | F   | 3.9             | 2.5                            | HHV6B                  | Parietal lobe                                            |
| Marmoset #9  | F   | 4.6             | 1                              | N/A                    | Optic nerve, frontal and parietal lobes                  |
| Marmoset #10 | M   | 3.6             | 4.5                            | N/A                    | Parietal, temporal, and occipital lobes                  |
| Marmoset #11 | F   | 2.5             | 3                              | HHV6A                  | Frontal lobe                                             |
| Marmoset #12 | F   | 4.6             | 5                              | N/A                    | Frontal, parietal, and temporal lobes                    |
| Marmoset #13 | F   | 4.3             | 2                              | HHV6A                  | Parietal lobe                                            |

**Supplementary Table 1. Demographics of marmosets involved in the study.** Data from 13 marmosets (5 male and 8 female) ages 2–6 years old at baseline, were included in the study. Additional inoculation, experimental durations, and lesion locations are also listed. HHV = human herpes virus.

|                                | <b>MR Sequence</b> | <b>In-plane res. (<math>\mu\text{m}</math>)</b> | <b>ST (<math>\mu\text{m}</math>)</b> | <b>TE (ms)</b> | <b>TR (ms)</b> | <b>FA</b> | <b>NA</b> | <b>TAT (min)</b> |
|--------------------------------|--------------------|-------------------------------------------------|--------------------------------------|----------------|----------------|-----------|-----------|------------------|
| <i>Marmosets #1–6 In vivo</i>  | PD-weighted        | 150 x 150                                       | 1000                                 | 16             | 2300           | 90        | 1         | 7.7              |
|                                | T2*-weighted       | 150 x 150                                       | 1000                                 | 18             | 2150           | 70        | 1         | 9.2              |
| <i>Marmosets #7–13 In vivo</i> | PD-weighted        | 125 x 125                                       | 600                                  | 16             | 2300           | 90        | 2         | 22               |
|                                | T2*-weighted       | 125 x 125                                       | 600                                  | 22             | 2132           | 70        | 2         | 20               |
| <i>Marmosets Ex vivo</i>       | T2*-weighted       | 100 x 100                                       | 100                                  | 10             | 50             | 16        | 10        | 36 (hours)       |
| <i>Human In vivo</i>           | T2*-weighted       | 215 x 215                                       | 1000                                 | 32             | 6000           | 50        | 1         | 8.5              |
| <i>Human Ex vivo</i>           | T2*-weighted       | 420 x 420                                       | 420                                  | 26             | 60             | 10        | 4         | 135              |

**Supplementary Table 2. Compilation of proton density (PD) and T2\*-weighted (*in-vivo* and *ex-vivo*) MRI sequence parameters used for marmoset and human brain tissue.** ST = slice thickness; TE = echo time; TR = repetition time; FA = flip angle; NA = number of averages; TAT = total acquisition time.

|         | Sex               | Age            | Disease Duration (Years) | EDSS      | RRMS | PPMS | SPMS | Treatment            |
|---------|-------------------|----------------|--------------------------|-----------|------|------|------|----------------------|
| In vivo | M = 11;<br>F = 28 | 53.3 ±<br>13.0 | 17 ± 11.3                | 3 (0–7.5) | 22   | 4    | 13   | 29 = Yes;<br>10 = No |
| Ex vivo | M = 1;<br>F = 3   | 61.0 ±<br>4.8  | 21.8 ± 5.9               | N/A       | 0    | 4    | 0    | 4 = Yes              |

**Supplementary Table 3. Demographics of multiple sclerosis patients involved in the study.** Mean and standard deviation for age and disease duration, and median and range for EDSS reported. EDSS = expanded disability status scale; MS = multiple sclerosis; RRMS = relapse remitting MS; PPMS = primary progressive MS; SPMS = secondary progressive MS.

|                 | Company                 | Host / Clonality | Antigen Retrieval Method        | Protein Blocking Reagent                                            | Primary Antibody Concentration | Primary Antibody Inoculation | Secondary Antibody                  |
|-----------------|-------------------------|------------------|---------------------------------|---------------------------------------------------------------------|--------------------------------|------------------------------|-------------------------------------|
| <i>Iba1</i>     | Wako                    | Rb, P            | HIER with Citrate Buffer, 20"   | Protein Block (Dako), 20" for HRP; 2.5% Horse Serum (Vector) for AP | 1:400                          | 1 hour, RT                   | Powervision Poly-HRP or ImmPRESS AP |
| <i>MRP14</i>    | Dako                    | Ms, M            | Proteinase K, 5"                | Protein Block (Dako), 20" for HRP; 2.5% Horse Serum (Vector) for AP | 1:400                          | 1 hour, RT                   | Powervision Poly-HRP or ImmPRESS AP |
| <i>CD3</i>      | Dako                    | Rb, P            | HIER with Tris-EDTA Buffer, 45" | Protein Block (Dako), 20"                                           | 1:100                          | Overnight, 4°C               | Powervision Poly-HRP                |
| <i>PLP</i>      | BioRad                  | Ms, M            | HIER with Citrate Buffer, 20"   | Protein Block (Dako), 20"                                           | 1:200                          | 1 hour, RT                   | Powervision Poly-HRP                |
| <i>GFAP</i>     | Dako                    | Rb, P            | Proteinase K, 5"                | Protein Block (Dako), 20"                                           | 1:400                          | 1 hour, RT                   | Powervision Poly-HRP                |
| <i>ASPA</i>     | GeneTex                 | Rb, P            | HIER with Citrate Buffer, 45"   | Protein Block (Dako), 20"                                           | 1:1500                         | 1 hour, RT                   | Powervision Poly-HRP                |
| <i>Olig2</i>    | EMD Millipore           | Rb, P            | None when double-staining       | 2.5% Horse Serum (Vector), 20"                                      | 1:200                          | 1 hour, RT                   | ImmPRESS AP                         |
| <i>TfR</i>      | ThermoFisher Scientific | Ms, M            | HIER with Citrate Buffer, 45"   | Background Buster (BioRad), 10"; Protein Block (Dako), 20"          | 1:100                          | Overnight, 4°C               | Powervision Poly-HRP                |
| <i>FpN</i>      | Abcam                   | Rb, P            | HIER with Citrate Buffer, 45"   | Background Buster (BioRad), 10"; Protein Block (Dako), 20"          | 1:100                          | Overnight, 4°C               | Powervision Poly-HRP                |
| <i>HpC</i>      | Abcam                   | Rb, P            | HIER with Citrate Buffer, 45"   | Background Buster (BioRad), 10"; Protein Block (Dako), 20"          | 1:100                          | Overnight, 4°C               | Powervision Poly-HRP                |
| <i>DMT1</i>     | Abcam                   | Rb, P            | HIER with Citrate Buffer, 45"   | Background Buster (BioRad), 10"; Protein Block (Dako), 20"          | 1:100                          | Overnight, 4°C               | Powervision Poly-HRP                |
| <i>Ferritin</i> | Abcam                   | Rb, P            | Proteinase K, 20"               | Protein Block (Dako), 20"                                           | 1:100                          | 1 hour, RT                   | Powervision Poly-HRP                |
| <i>SOD</i>      | Enzo                    | Rb, P            | HIER with Citrate Buffer, 20"   | Background Buster (BioRad), 10"; Protein Block (Dako), 20"          | 1:200                          | Overnight, 4°C               | Powervision Poly-HRP                |
| <i>DMT1</i>     | Abcam                   | Rb, P            | HIER with Citrate Buffer, 45"   | Background Buster (BioRad), 10"; Protein Block (Dako), 20"          | 1:100                          | Overnight, 4°C               | Powervision Poly-HRP                |
| <i>HIF-2a</i>   | GeneTex                 | Ms, M            | HIER with Citrate Buffer, 20"   | Background Buster (BioRad), 10"; Protein Block (Dako), 20"          | 1:200                          | Overnight, 4°C               | Powervision Poly-HRP                |

**Supplementary Table 4. Immunohistochemistry methodology.** For each of the immunohistochemical targets, respective companies, clonalities and hosts, and methods for antigen retrieval, blocking, and primary and secondary antibody inoculation are listed. HIER = heat-induced epitope retrieval; RT = room temperature; P = polyclonal antibody; M = monoclonal antibody; Rb = rabbit; Ms = mouse.
